# Supplementary material for: miR-19b enhances proliferation and apoptosis resistance via the EGFR signaling pathway by targeting PP2A and BIM in non-small cell lung cancer
Source: Springer Nature journal article supplement (doi:10.1186/s12943-018-0781-5), 2018-02-15
Supplement: MOESM4 [file 15474722]

Suppl. Fig. S3

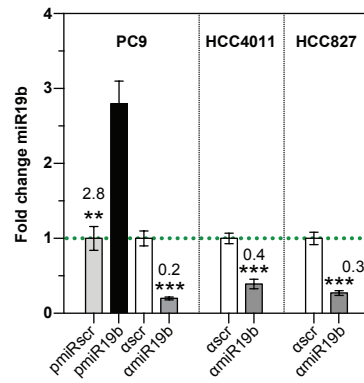

**Supplementary Figure S3: miR-19b expression levels of pre-miR-19b and anti-miR-19b-transduced NSCLC cells.** miR-19b expression levels were analyzed by real-time qPCR relative to RNU48. Results are presented as mean  $\pm$ SD (n=3). \*, p<0.05; \*\*, p<0.01; \*\*\*, p<0.001.
