# Supplementary material for: miR-19b enhances proliferation and apoptosis resistance via the EGFR signaling pathway by targeting PP2A and BIM in non-small cell lung cancer
Source: Springer Nature journal article supplement (doi:10.1186/s12943-018-0781-5), 2018-02-15
Supplement: MOESM6 [file 15474722]

Suppl. Fig. S5

a

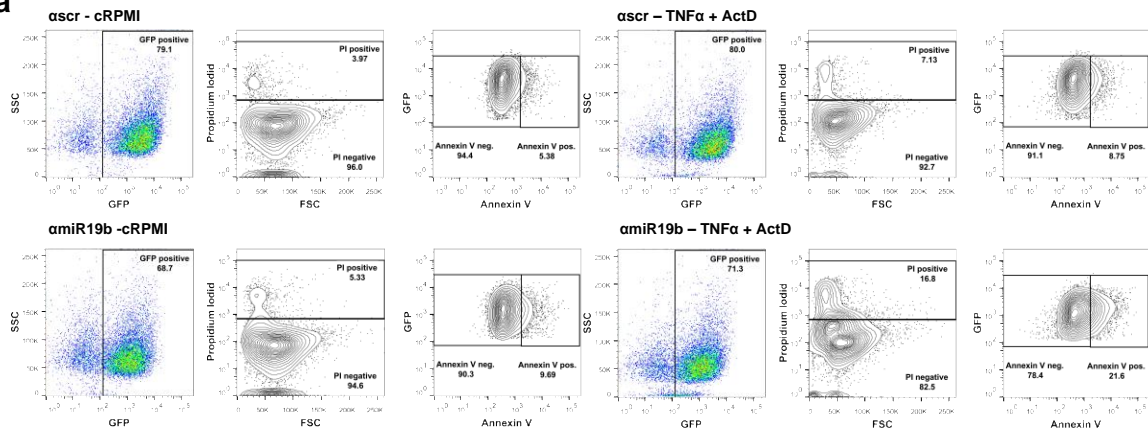

b

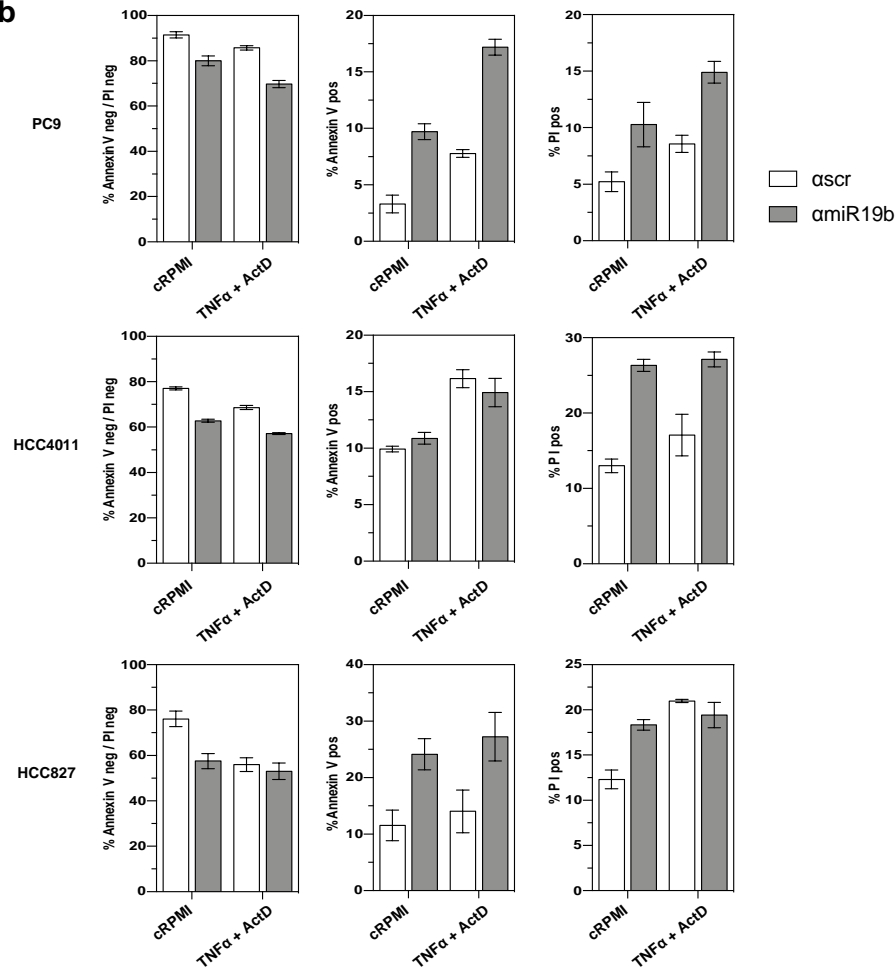

**Supplementary Figure S5: miR-19b confers apoptosis resistance in EGFR mutant NSCLC cells.** a Representative examples of dot plots and densitometric plots of PC9 cells transduced with GFP/anti-miR-19b (amiR19b) or GFP/anti-miR scramble control (ascr) in the presence (TNF $\alpha$ +ActD) or absence (cRPMI) of an apoptotic trigger. GFP-positive cells were analysed for Annexin V / propidium iodide (Annexin V / PI) by flow cytometry. b Percent Annexin V-positive, PI-positive and Annexin V/PI-negative cells of three EGFR mutant NSCLC cell lines in the presence or absence of an apoptotic trigger (n=3).
