# Supplementary material for: miR-19b enhances proliferation and apoptosis resistance via the EGFR signaling pathway by targeting PP2A and BIM in non-small cell lung cancer
Source: Mol Cancer. 2018 Feb 19;17:44. doi: 10.1186/s12943-018-0781-5 (PMC5817797; doi:10.1186/s12943-018-0781-5)
Supplement: Supplementary file 1 — Table S1. TargetScanHuman Prediction of microRNA hsa-miR-19b-3p targets. (PDF 38 kb) [file 12943_2018_781_MOESM1_ESM.pdf]

**Suppl. TableS1: TargetScanHuman Prediction of microRNA hsa-miR-19b-3p targets.**

| PPP2R5E (ENST00000337537.7)         | Predicted consequential pairing of target region (top) and miRNA (bottom) |                                                                                                        | Site type  | Context++ score | Context++ score percentile | Weighted context++ score | Conserved branch length | P <sub>CT</sub> |
|-------------------------------------|---------------------------------------------------------------------------|--------------------------------------------------------------------------------------------------------|------------|-----------------|----------------------------|--------------------------|-------------------------|-----------------|
| Position 505-512 of PPP2R5E 3'UTR   | 5'                                                                        | ...UUAACAUCUUUUUCUUUUGCACA...                                                                          | 8mer       | -0.34           | 96                         | -0.34                    | 4.765                   | 0.84            |
| has-miR-19b-3p                      | 3'                                                                        | AGUCAAACGUAUCUAAACGUGU                                                                                 |            |                 |                            |                          |                         |                 |
| Position 3584-3591 of PPP2R5E 3'UTR | 5'                                                                        | ...AUCACUGAUGUUUUUAUUUGCACA...                                                                         | 8mer       | -0.21           | 86                         | -0.04                    | 3.108                   | 0.49            |
| has-miR-19b-3p                      | 3'                                                                        | AGUCAAACGUAUCUAAACGUGU                                                                                 |            |                 |                            |                          |                         |                 |
| Luciferase target construct         |                                                                           | Predicted target site (top) and mutated target site cloned into luciferase reporter construct (bottom) |            |                 |                            |                          |                         |                 |
| Luc PPP2R5E TS                      | 5' -TCGAGTTTAACATCTTTTCTTTTGCACATCTTCCTGAGTTGAATGTCCT-3'                  |                                                                                                        |            |                 |                            |                          |                         |                 |
| Luc PPP2R5E mTS                     | 5' -TCGAGTTTAACATCTTTTTCGGGTACACTCTTCCTGAGTTGAATGTCCT-3'                  |                                                                                                        |            |                 |                            |                          |                         |                 |
| BCL2L11 (ENTST00000393256.7)        | Predicted consequential pairing of target region (top) and miRNA (bottom) |                                                                                                        | Site type  | Context++ score | Context++ score percentile | Weighted context++ score | Conserved branch length | P <sub>CT</sub> |
| Position 4092-4098 of BCL2L11 3'UTR | 5'                                                                        | ...CUGGCUUACUUGUGUUUUGCACA...                                                                          | 7mer<br>m8 | -0.23           | 88                         | -0.06                    | 7.317                   | 0.83            |
| has-miR-19b-3p                      | 3'                                                                        | AGUCAAACGUAUCUAAACGUGU                                                                                 |            |                 |                            |                          |                         |                 |
| Luciferase target construct         |                                                                           | Predicted target site (top) and mutated target site cloned into luciferase reporter construct (bottom) |            |                 |                            |                          |                         |                 |
| Luc BCL2L11 TS                      | 5' -TCGAGGTTTCCTGGCTTACTTGTGTTTGCACATGATGAATTTGACT-3'                     |                                                                                                        |            |                 |                            |                          |                         |                 |
| Luc BCL2L11 mTS                     | 5' -TCGAGGTTTCCTGGCTTACTTGTGGGGTACATGATGAATTTGACT-3'                      |                                                                                                        |            |                 |                            |                          |                         |                 |

Context++ score and features that contribute to the context++ score are evaluated as in (Agarwal et al., 2015)

Conserved branch lengths and PTC are evaluated as in (Friedman et al., 2009), with an expanded 84-species alignment as described in (Agarwal et al., 2015).

Table was adapted from targetscan.org (May 22<sup>nd</sup> 2017).
